# Supplementary figures and images for: Effects on Serum Inflammatory Cytokines of Cholecalciferol Supplementation in Healthy Subjects with Vitamin D Deficiency
Source: MDPI journal article supplement (doi:10.3390/nu14224823), 2022-11-14

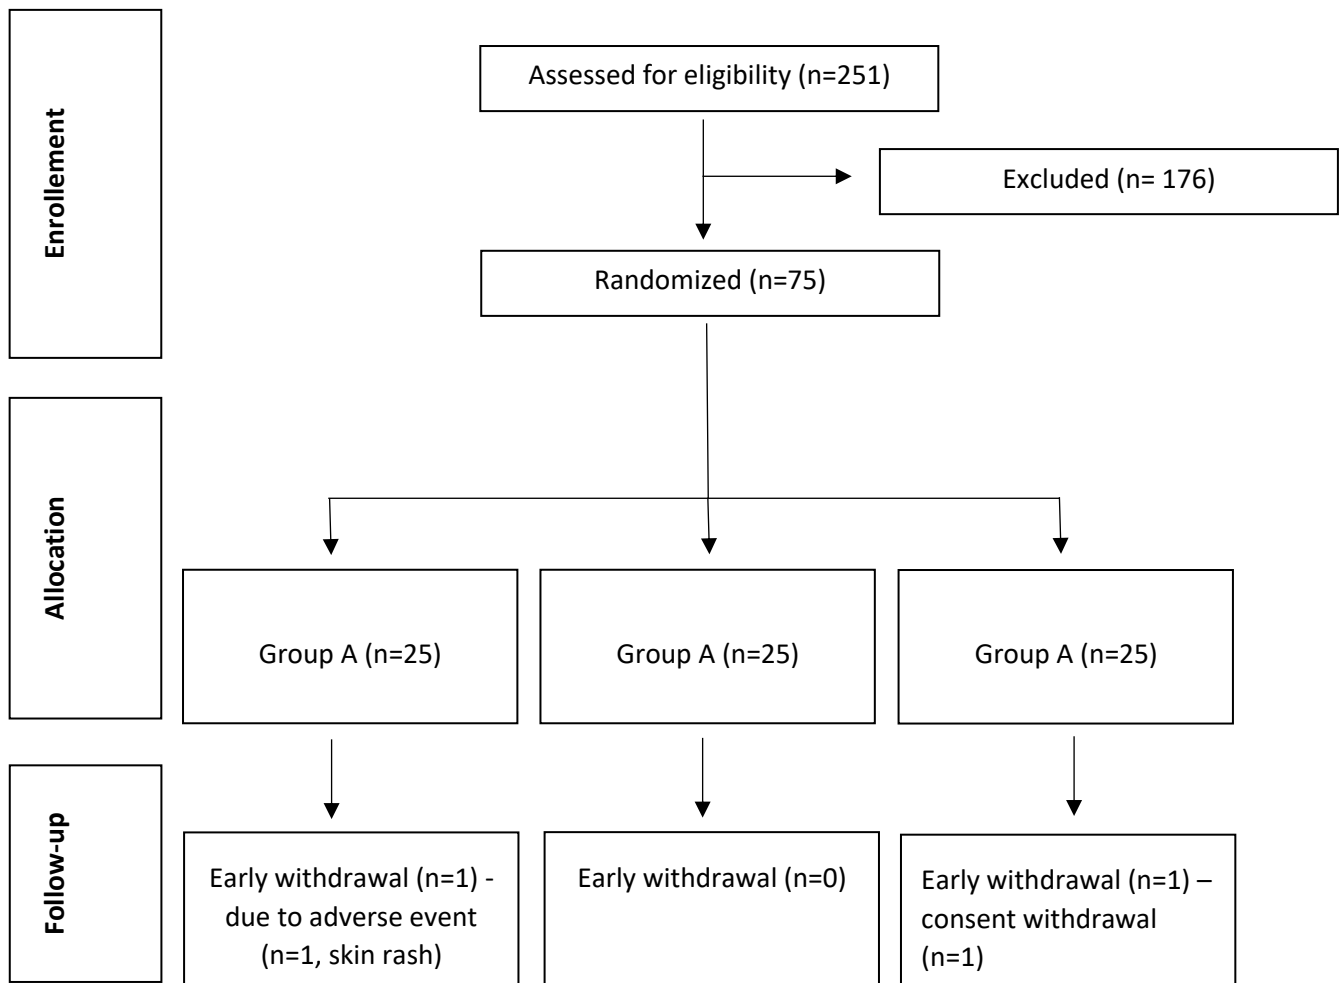

**Supplementary Figure S1.** Flowchart of the study.

Supplement: s1 [file s1]
